# Supplementary material for: Direct formation of β-glycosides of N-acetyl glycosamines mediated by rare earth metal triflates
Source: Royal Society of Chemistry journal article supplement (doi:10.1039/b807064d), 2008-01-01
Supplement: b807064d.pdf [file b807064d.pdf]

## Electronic Supplementary Information for: Direct Formation of $\beta$ -Glycosides of *N*-Acetyl Glycosamines Mediated by Rare Earth Metal Triflates

H. Christensen, M. S. Christiansen, J. Petersen, H. H. Jensen

### **2-Bromoethyl 2-acetamido-3,4,6-tri-*O*-acetyl-2-deoxy- $\beta$ -D-glucopyranoside (7).**

Donor **3** (197 mg, 0.51 mmol) and 2-bromoethanol (**6**) (0.11 mL, 1.54 mmol) were coupled according to the general procedure with Sc(OTf)<sub>3</sub> (37 mg, 0.075 mmol) as catalyst in dry CH<sub>2</sub>Cl<sub>2</sub> (3 mL). After 27 h TLC analysis indicated no further reaction. The reaction mixture was worked up as described in the general procedure and purified by column chromatography (1:2 pentane/EtOAc) to give the desired glycoside **7** (153 mg, 67 %) as white crystals. *R*<sub>f</sub> (EtOAc): 0.50; Mp(uncorr.): 166-167 °C (EtOAc/pentane). <sup>1</sup>H-NMR (CDCl<sub>3</sub>, 400 MHz):  $\delta$  5.45 (d, 1H, *J*<sub>NH,2</sub> 8.4 Hz, NH), 5.31 (t, 1H, *J*<sub>2,3</sub> = *J*<sub>3,4</sub> 9.6 Hz, H3), 5.06 (t, 1H, H4), 4.77 (d, 1H, *J*<sub>1,2</sub> = 8.4 Hz, H-1), 4.25 (dd, 1H, *J*<sub>5,6a</sub> 4.8 Hz, *J*<sub>6a,6b</sub> 12.2 Hz, H6a), 4.19-4.12 (m, 2H, H6b, OCHHCH<sub>2</sub>Br), 3.90-3.80 (m, 2H, H2, OCHHCH<sub>2</sub>Br), 3.71 (ddd, 1H, *J*<sub>5,6b</sub> 2.2 Hz, H5), 3.49-3.46 (m, 2H, OCH<sub>2</sub>CH<sub>2</sub>Br), 2.09, 2.03, 2.02, 1.97 (s, 12H, COCH<sub>3</sub>). <sup>13</sup>C-NMR (CDCl<sub>3</sub>, 100 MHz):  $\delta$  171.1, 170.9, 170.7, 169.6 (CO), 101.2 (C1), 72.4, 72.2 (C3, C5), 69.7, 68.8 (C2, C4), 62.3 (C6), 54.9 (OCH<sub>2</sub>CH<sub>2</sub>Br), 30.8 (OCH<sub>2</sub>CH<sub>2</sub>Br), 23.6, 21.0, 20.9, 20.8 (C(O)CH<sub>3</sub>); HRMS: calcd for C<sub>16</sub>H<sub>24</sub>NO<sub>9</sub><sup>79</sup>BrNa: 476.0532, found: 476.0533. [ $\alpha$ ]<sub>D</sub><sup>21</sup> -11.8 (c 1.0, CHCl<sub>3</sub>).

### **Cyclohexyl 2-acetamido-3,4,6-tri-*O*-acetyl-2-deoxy- $\beta$ -D-glucopyranoside (9).**

Donor **3** (200 mg, 0.51 mmol) and cyclohexanol (**8**) (0.16 mL, 1.52 mmol), freshly distilled from sodium, were coupled according to the general procedure with Sc(OTf)<sub>3</sub> (37 mg, 0.076 mmol) as catalyst in dry CH<sub>2</sub>Cl<sub>2</sub> (2.5 mL). After 48 h TLC analysis indicated no further reaction. The reaction

mixture was worked up as described in the general procedure and purified by column chromatography (1:3 pentane/EtOAc → EtOAc) to give the desired cyclohexyl glycoside **9** (184 mg, 84 %) as colourless crystals.  $R_f$ (EtOAc): 0.53. Mp(uncorr.): 180-181 °C (EtOAc/pentane); LRMS(ES<sup>+</sup>): calcd. for C<sub>20</sub>H<sub>24</sub>NO<sub>9</sub>Na: 452.2, found: 452.0. Spectral data was in accordance with previously reported results.<sup>i</sup>

***N*-(9-Fluorenylmethoxycarbonyl)-(2-acetamido-2-deoxy-3,4,6-tri-*O*-acetyl-β-D-glucopyranosyl)-L-serine methyl ester (**11**).**

Donor **3** (129 mg, 0.33 mmol) and *N*-(9-fluorenylmethyl-oxycarbonyl)-L-serine methyl ester (**10**) (169 mg, 0.50 mmol) were coupled according to the general procedure with Sc(OTf)<sub>3</sub> (25 mg, 0.050 mmol) as catalyst in dry CH<sub>2</sub>Cl<sub>2</sub> (3 mL). After 72 h TLC analysis indicated no further reaction. The reaction mixture was worked up as described in the general procedure and purified by column chromatography (1:4 pentane/EtOAc → EtOAc) which gave glycoside **11** (111 mg, 50 %) as pale yellow crystals.  $R_f$ (EtOAc): 0.56; Mp(uncorr.): 162-165 °C (EtOAc/pentane); <sup>1</sup>H-NMR (CDCl<sub>3</sub>, 400 MHz): δ 7.72 (dd, 2H,  $J$  3.4 Hz,  $J$  7.4 Hz, Fmoc Ph), 7.58 (d, 2H,  $J$  5.0 Hz, Fmoc Ph), 7.34 (t, 2H,  $J$  7.4 Hz, Fmoc Ph), 7.27 (t, 2H,  $J$  7.4 Hz, Fmoc Ph), 5.67 (d, 1H,  $J_{\text{NH,CH-Ser}}$  7.6 Hz, NH-Ser), 5.41 (d, 1H,  $J_{\text{NH,2}}$  8.0 Hz, NHAc), 5.17 (t, 1H,  $J_{2,3} = J_{3,4}$  10.0 Hz, H3), 4.97 (t, 1H, H4), 4.56 (d, 1H,  $J_{1,2}$  8.4 Hz, H1), 4.43-4.38 (m, 3H, CH-Ser, CH<sub>2</sub>Fmoc), 4.20-4.12 (m, 3H, H6a, CH Fmoc, CHH-Ser), 4.05 (dd, 1H,  $J_{5,6b}$  2.4 Hz,  $J_{6a,6b}$  12.4 Hz, H6b), 3.79-3.71 (m, 2H, H2, CHH-Ser), 3.70 (s, 3H, CO<sub>2</sub>CH<sub>3</sub>), 3.60 (ddd, 1H,  $J_{5,6a}$  4.8 Hz, H5), 2.01, 1.97, 1.96, 1.78 (s, 12H, COCH<sub>3</sub>). <sup>13</sup>C-NMR (CDCl<sub>3</sub>, 100 MHz): δ 171.1, 170.9, 170.4, 169.6 (COCH<sub>3</sub>, CO<sub>2</sub>CH<sub>3</sub>), 156.3 (CO Fmoc), 144.1, 143.9, 141.6 (C-*ipso* Fmoc), 128.0, 127.4, 125.4, 120.3 (Ar Fmoc), 101.0 (C1), 72.4, 72.2 (C3, C5), 69.1, 68.7 (C4, CH<sub>2</sub>-Ser), 67.1 (CH<sub>2</sub> Fmoc), 62.3 (C6), 54.6, 54.4 (C2, CH-Ser), 53.0 (CO<sub>2</sub>CH<sub>3</sub>), 47.4 (CH Fmoc), 23.4, 20.9, 20.9, 20.8 (COCH<sub>3</sub>); HRMS(ES<sup>+</sup>): calcd. for C<sub>33</sub>H<sub>38</sub>N<sub>2</sub>O<sub>13</sub>Na: 693.2272; found: 693.2243.  $[\alpha]_D^{21}$  3.5 (c 1.0, CHCl<sub>3</sub>).

**O-(2-Acetamido-3,4,6-tri-O-acetyl-2-deoxy-D-glucopyranosyl)- $\beta$ -(1-6)-1,2;3,4-di-O-isopropylidene- $\alpha$ -D-galactopyranose (13).**

Donor **3** (734 mg, 1.89 mmol) and 1,2;3,4-di-O-isopropylidene- $\alpha$ -D-galactopyranose (**12**) (220 mg, 0.85 mmol) were coupled according to the general procedure with Sc(OTf)<sub>3</sub> (63 mg, 0.13 mmol) as catalyst in dry CH<sub>2</sub>Cl<sub>2</sub> (3 mL). After 20 h TLC analysis indicated no further reaction. The reaction mixture was worked up as described in the general procedure and purified by column chromatography (acetone/pentane 2:5) to give the desired disaccharide **13** (0.387 g, 78%) as a white powder. *R*<sub>f</sub>(acetone/pentane 4:5) 0.47; Mp(uncorr.): 72-74 °C (acetone/pentane). <sup>1</sup>H-NMR (CDCl<sub>3</sub>, 400 MHz):  $\delta$  5.59 (d, 1H, *J*<sub>NH,2</sub> 8.8 Hz, NHAc), 5.50 (d, 1H, *J*<sub>1',2'</sub> 5.0 Hz, H1), 5.14 (t, 1H, *J*<sub>2',3'</sub> = *J*<sub>3,4</sub> 9.6 Hz, H3'), 5.08 (t, 1H, H4'), 4.68 (d, 1H, *J*<sub>1',2'</sub> 8.4 Hz, H1'), 4.56 (dd, 1H, *J*<sub>3,4</sub> 2.4 Hz, *J*<sub>2,3</sub> 7.6 Hz, H3), 4.29 (dd, 1H, H2), 4.25 (dd, 1H, *J*<sub>6'a,6'b</sub> 12.4 Hz, *J*<sub>6a,5</sub> 4.6 Hz, H6'a), 4.14-4.09 (m, 2H, H4, H6'b), 4.04-3.92 (m, 3H, H2', H6a, H5'), 3.72 (dd, 1H, *J*<sub>6a,6b</sub> 13.2 Hz, *J*<sub>5,6b</sub> 9.2 Hz, H6b), 3.66 (ddd, 1H, *J*<sub>5',6'b</sub> 2.4 Hz, H5'), 2.06, 2.00, 1.99, 1.94 (s, 12H, C(O)CH<sub>3</sub>), 1.47 (s, 3H, O<sub>2</sub>CMeCH<sub>3</sub>), 1.42 (s, 3H, O<sub>2</sub>CCH<sub>3</sub>Me), 1.30 (s, 6H, O<sub>2</sub>CMeCH<sub>3</sub>); <sup>13</sup>C-NMR (CDCl<sub>3</sub>, 100 MHz)  $\delta$  171.1, 170.9, 170.6, 169.5 (CO), 109.6, 108.8 ((CH<sub>3</sub>)<sub>2</sub>CO<sub>2</sub>), 102.1 (C1'), 96.4 (C1), 73.4 (C3'), 72.0 (C5'), 71.2 (C4), 70.8 (C3), 70.5 (C2), 69.2 (C6), 68.7 (C4'), 68.5 (C2'/C5), 62.3 (C6'), 54.3 (C2'/C5), 26.3, 26.1, 25.2, 24.5, 23.5, 20.9, 20.9, 20.8 (C(O)CH<sub>3</sub>); [ $\alpha$ ]<sub>D</sub><sup>21</sup> -51.3 (c 1.0, CHCl<sub>3</sub>). Spectral data was in accordance with previously reported results.<sup>ii</sup>

**Methyl O-(2-acetamido-3,4,6-tri-O-acetyl-2-deoxy- $\beta$ -D-glucopyranosyl)-(1 $\rightarrow$ 6)-2,3,4-tri-O-benzyl- $\alpha$ -D-glucopyranoside (15):**

Donor **3** (210 mg, 0.54 mmol, microwave heating; 410 mg, 0.9 mmol, conventional heating), methyl glucopyranoside **14** (100 mg, 0.22 mmol), and Sc(OTf)<sub>3</sub> (16 mg, 0.023 mmol) was dissolved in dry CH<sub>2</sub>Cl<sub>2</sub> (2 mL) and heated to 80 °C for 3 h. by microwave irradiation or to reflux for 72 h by conventional heating. The mixture was diluted with CH<sub>2</sub>Cl<sub>2</sub> and washed with water followed by extraction with CH<sub>2</sub>Cl<sub>2</sub> as described in the general procedure. The combined organic extracts were dried over MgSO<sub>4</sub> and purified by column chromatography (EtOAc/pentane 1:1  $\rightarrow$  1:0) to give the desired disaccharide

**16** (128 mg, 75 %, microwave heating; 145 mg, 85% conventional heating) as a white solid.  $R_f$ (EtOAc) 0.6.  $^1\text{H-NMR}$  (400 MHz,  $\text{CDCl}_3$ ):  $\delta$  7.29-7.19 (m, 15H, ArH), 5.33 (d, 1H,  $J_{\text{NH},2}$  8.4 Hz, NH), 5.20 (t, 1H,  $J_{2',3'} = J_{3',4'}$  10.0 Hz, H3'), 4.97 (t, 1H, H4'), 4.90 (d, 1H,  $J_{\text{gem}}$  10.8 Hz, PhCHH), 4.76 (d, 1H,  $J_{\text{gem}}$  10.8 Hz, PhCHH), 4.72 (d, 1H,  $J_{\text{gem}}$  10.8 Hz, PhCHH), 4.70 (d, 1H,  $J_{\text{gem}}$  12.0 Hz, PhCHH), 4.61 (d, 1H,  $J_{1',2'}$  8.0 Hz, H1'), 4.58 (d, 1H,  $J_{\text{gem}}$  12.0 Hz, PhCHH), 4.52 (d, 1H,  $J_{1,2}$  3.2 Hz, H1), 4.50 (d, 1H,  $J_{\text{gem}}$  10.8 Hz, PhCHH), 4.14 (dd, 1H,  $J_{5',6'a}$  4.8 Hz,  $J_{6'a,6'b}$  12.0 Hz, H6'a), 4.02 (dd, 1H,  $J_{5',6'b}$  2.4 Hz, H6'b), 3.98 (d, 1H,  $J_{6a,6b}$  10.2 Hz, H6a), 3.90 (t, 1H, H3), 3.78 (q, 1H, H2'), 3.70-3.57 (m, 3H, H5', H5, H6b), 3.44 (dd, 1H,  $J_{2,3}$  9.6 Hz, H2), 3.40 (t, 1H,  $J_{3,4}$  9.6 Hz, H4), 3.28 (s, 3H, OCH<sub>3</sub>), 1.94, 1.74 (s, 12H, C(O)CH<sub>3</sub>).  $^{13}\text{C-NMR}$  (100 MHz,  $\text{CDCl}_3$ )  $\delta$  171.0, 169.6 (CO), 139.0, 138.3, 128.7, 128.1, 127.8 (Ar), 100.8 (C1'), 98.3 (C1), 82.2 (C3), 80.0 (C2), 77.6 (C4), 75.9 (PhCH<sub>2</sub>), 74.8 (PhCH<sub>2</sub>), 73.6 (PhCH<sub>2</sub>), 72.5 (C3'), 72.1, 69.7 (C5, C5'), 68.9 (C4'), 67.9 (C6), 62.4 (C6'), 55.4 (OCH<sub>3</sub>), 54.9 (C2'), 23.5, 20.9, 20.9 (C(O)CH<sub>3</sub>). Spectral data is in accordance with previously reported values.<sup>iii</sup>

**Methyl O-(2-acetamido-3,4,6-tri-O-acetyl-2-deoxy- $\beta$ -D-glucopyranosyl)-(1 $\rightarrow$ 4)-2,3,6-tri-O-benzyl- $\alpha$ -D-glucopyranoside (17).**

Acceptor **16** (103 mg, 0.22 mmol) and donor **3** (345 mg, 0.89 mmol) were coupled according to the general procedure with Sc(OTf)<sub>3</sub> (66 mg, 0.13 mmol) as catalyst in dry CH<sub>2</sub>Cl<sub>2</sub>. After 72 h TLC analysis indicated no further reaction. The reaction mixture was worked up as described in the general procedure and purified by column chromatography (EtOAc/pentane 1:5  $\rightarrow$  EtOAc) to give the desired disaccharide **17** (37 mg, 21%) and unreacted acceptor (**16**) (68 mg).  $R_f$ (EtOAc) 0.55.  $^1\text{H-NMR}$  ( $\text{CDCl}_3$ , 400 MHz)  $\delta$  7.44-7.15 (m, 15H, Ar-H), 4.92 (d, 1H,  $J$  11.3 Hz, PhCHHa), 4.87 (m, 1H, H4'), 4.82 (m, 1H, H3'), 4.77 (d, 1H,  $J$  12.2 Hz, PhCHHb), 4.70 (d, 1H, PhCHHa), 4.64 (d, 1H,  $J$  12.0, PhCHHc), 4.57 (d, 1H, PhCHHc), 4.56 (d, 1H,  $J_{1,2}$  3.6 Hz, H1), 4.53 (d, 1H,  $J_{\text{NH},2'}$  9.2 Hz, NH), 4.36 (d, 1H,  $J_{1',2'}$  8.4 Hz, H1'), 4.31 (d, 1H, PhCHHb), 4.02 (dd, 1H,  $J_{5',6a'}$  4.4 Hz,  $J_{6a',6b'}$  12.4 Hz, H6a'), 3.80-3.72 (m, 4H, H2', H3, H4, H6b'), 3.59-3.53 (m, 2H, H5, H6a), 3.43-3.34 (m, 3H, H2, H5', H6b), 3.29 (s, 3H, OCH<sub>3</sub>), 1.93, 1.91, 1.86, 1.64 (s, 12 H, C(O)CH<sub>3</sub>).  $^{13}\text{C-NMR}$

(CDCl<sub>3</sub>, 100 MHz)  $\delta$  170.9, 170.8, 170.0, 169.6 (CO), 139.8, 138.5, 138.0, 129.2, 129.1, 129.0, 128.6, 128.4, 128.3, 128.0, 127.3, 127.2 (Ar), 100.7 (C1'), 98.6 (C1), 80.3 (C3), 79.1 (C2), 77.5 (C4), 75.2, 74.0, 73.7 (PhCH<sub>2</sub>), 73.1 (C3'), 71.6 (C5'), 69.6 (C5), 68.7 (C4'), 67.8 (C6), 62.1 (C6'), 55.6 (OCH<sub>3</sub>), 54.8 (C2'), 23.4 (NHC(O)CH<sub>3</sub>), 20.8 (OC(O)CH<sub>3</sub>).  $[\alpha]_D^{22}$  14 (c 1.0, CHCl<sub>3</sub>); HRMS(ES<sup>+</sup>): calcd for C<sub>42</sub>H<sub>51</sub>NO<sub>14</sub>Na: 816.3208; found, 816.3203.

**Methyl O-(2-acetamido-3,4,6-tri-O-acetyl-2-deoxy- $\beta$ -D-glucopyranosyl)-(1 $\rightarrow$ 4)-2,3,6-tri-O-benzyl- $\alpha$ -D-glucopyranoside (17) by microwave irradiation.**

Donor **3** (168 mg, 0.43 mmol) and methyl glucoside **16** (100 mg, 0.23 mmol) were dissolved in CH<sub>2</sub>Cl<sub>2</sub> (1.2 mL) before Sc(OTf)<sub>3</sub> (16 mg, 0.032 mmol) was added. The reaction mixture was heated by microwave irradiation to 80 °C for 8 h. After this period of time more donor (**3**) (167 mg, 0.43 mmol) and Sc(OTf)<sub>3</sub> (16 mg, 0.032 mmol) were added and the mixture heated as before for another 8 h. The reaction mixture was loaded directly onto a column of silicagel and purified as mentioned above. This gave desired disaccharide (**17**) (73 mg, 43%) and unreacted acceptor (**16**) (37 mg, recovered yield of **17**: 68%).

**Allyl 2,3,6-tri-O-benzyl- $\alpha$ -D-galactopyranoside (19):**

To a stirred solution of benzylidene **24** (1.33 g, 2.7 mmol) in CH<sub>2</sub>Cl<sub>2</sub> (10 mL) was added triethylsilane (3.55 mL, 22.2 mmol) and trifluoroacetic acid (1.83 mL, 24.6 mmol). The mixture was stirred for 5 min at 0 °C and then at ambient temperature for 24 h before neutralised with NaHCO<sub>3</sub> (sat. aq) and extracted with CH<sub>2</sub>Cl<sub>2</sub>. The resulting product was purified by column chromatography (silica, EtOAc/pentane 1:4). This gave the desired tribenzylated galactoside **19** as a colourless oil (813 mg, 61 %).  $R_f$ (EtOAc/pentane 1:4) 0.20. <sup>1</sup>H-NMR (CDCl<sub>3</sub>, 400 MHz)  $\delta$  7.39-7.26 (m, 15H, ArH), 5.99-5.90 (m, 1H, CH<sub>2</sub>CH=CH<sub>2</sub>), 5.32 (dq,  $J$  1.6 Hz,  $J_{vic}$  17.2 Hz, CH=CHH), 5.21 (b d,  $J_{vic}$  10.0 Hz, CH=CHH), 4.88 (d, 1H,  $J_{1,2}$  4.8 Hz, H1), 4.81 (d, 1H,  $J_{gem}$  11.6 Hz, PhCHH), 4.80 (d, 1H,  $J_{gem}$  12.0 Hz, PhCHH), 4.71 (d, 1H,  $J_{gem}$  11.6 Hz, PhCHH), 4.66 (d, 1H,  $J_{gem}$  12.0 Hz, PhCHH), 4.60 (d,

$^1\text{H}$ ,  $J_{\text{gem}}$  12.0 Hz, PhCHHO6), 4.56 (d, 1H, PhCHHO6), 4.18 (ddt,  $J_{\text{vic}}$  5.2 Hz,  $J_{\text{gem}}$  13.2 Hz, OCHHCH=CH<sub>2</sub>), 4.09 (b s, 1H, H4), 4.04 (ddt, 1H,  $J_{\text{vic}}$  6.8 Hz, OCHHCH=CH<sub>2</sub>), 3.97 (b t, 1H,  $J_{5,6a} = J_{5,6b}$  5.6 Hz, H5), 3.93-3.86 (m, 2H, H2, H3), 3.74 (dd, 1H,  $J_{6a,6b}$  10.0 Hz, H6a), 3.68 (dd, 1H, H6b).  $^{13}\text{C}$ -NMR (100 MHz, CDCl<sub>3</sub>)  $\delta$  138.8, 138.5, 138.4, 128.7, 128.6, 128.2, 128.1, 127.9 (Ar), 134.2 (CH=CH<sub>2</sub>), 118.3 (CH=CH<sub>2</sub>), 96.5 (C1), 78.0, 76.1 (C2, C3), 73.8, 73.6, 73.1 (PhCH<sub>2</sub>), 69.9 (C6), 68.9 (C5), 68.6 (CH<sub>2</sub>CH=CH<sub>2</sub>), 68.4 (C4). HRMS(ES<sup>+</sup>): calcd. for: C<sub>30</sub>H<sub>34</sub>O<sub>6</sub>Na: 513.2253; found 513.2258. Spectral data was largely in accordance with previously published values.<sup>iv</sup>

**O-(2-acetamido-2-deoxy- $\beta$ -D-glucopyranosyl)-(1 $\rightarrow$ 3)-2-acetamido-2-deoxy- $\alpha/\beta$ -D-glucopyranose (26):**

A balloon of H<sub>2</sub>-gas was applied to a vigorously stirred solution of protected disaccharide **23** (120 mg, 0.16 mmol) and Pd(OH)<sub>2</sub>/C (10%, 25 mg) in acetic acid (2 mL). The reaction mixture was stirred overnight before the catalyst was removed by filtration through a bed of Celite<sup>®</sup>. The remaining acetic acid was carefully removed by repeated co-evaporation with toluene before the residue was dissolved in methanol (3 mL) to which had been added a catalytic amount of Na-metal. The reaction mixture was stirred overnight at 40 °C before diluted with H<sub>2</sub>O (5 mL) and neutralised with Amberlite (IR-120 H<sup>+</sup>). The solvents were removed under reduced pressure and the crude product underwent  $^{13}\text{C}$ -NMR analysis (D<sub>2</sub>O, 100 MHz) to confirm the linkage being 1 $\rightarrow$ 3. Error! Bookmark not defined.a HRMS(ES<sup>+</sup>): calcd. for C<sub>16</sub>H<sub>28</sub>N<sub>2</sub>O<sub>11</sub>Na: 447.1591; found: 447.1593.

**Benzyl 2-acetamido-3,4,6-tri-O-acetyl-2-deoxy- $\alpha/\beta$ -D-glucopyranoside from anomeric mixture of donors (5 $\alpha\beta$ ):**

An anomeric mixture of D-N-acetyl glucosamine tetraacetate (**3 $\alpha\beta$** ) ( $\alpha/\beta$  4.6:1, 200 mg, 0.51 mmol), BnOH (**4**) (0.16 mL, 1.54 mmol), and Sc(OTf)<sub>3</sub> were dissolved in CH<sub>2</sub>Cl<sub>2</sub> (1.45 mL). The mixture was heated to 110 °C under microwave conditions for 5 hours. The reaction mixture was diluted with CH<sub>2</sub>Cl<sub>2</sub>, washed with NaHCO<sub>3</sub> (sat. aq.), and dried (MgSO<sub>4</sub>) before purified by

column chromatography (EtOAc/pentane 1:1 → 2:1) to give an anomeric mixture of benzyl glycosides **5 $\alpha\beta$**  ( $\alpha/\beta$  21/79, 180 mg, 80%).

Data for  $\alpha$ -anomer (less polar than  $\beta$ -anomer):  $R_f$ (EtOAc) 0.61.  $^1\text{H-NMR}$  (400 MHz,  $\text{CDCl}_3$ )  $\delta$  7.40-7.31 (m, 5H, ArH), 5.63 (d, 1H,  $J_{2,\text{NH}}$  9.2 Hz, NH), 5.23 (t, 1H,  $J_{2,3;3,4}$  10.2 Hz, H3), 5.13 (t, 1H, H4), 4.94 (d, 1H,  $J_{1,2}$  3.6 Hz, H1), 4.71 (d, 1H,  $J_{\text{gem}}$  11.6 Hz, PhCHHO), 4.52 (d, 1H, PhCHHO), 4.35 (ddd, 1H, H2), 4.23 (dd, 1H,  $J_{5,6a}$  4.4 Hz,  $J_{6a,6b}$  12.4 Hz, H6a), 4.03 (dd, 1H,  $J_{5,6b}$  2.4 Hz, H6b), 3.99-3.95 (m, 1H, H5), 2.10, 2.01, 2.00, 1.89 (s, 12H, C(O)CH<sub>3</sub>).  $^{13}\text{C-NMR}$  (100 MHz,  $\text{CDCl}_3$ )  $\delta$  171.6, 170.9, 170.1, 169.5 (CO), 136.7, 128.9, 128.6, 128.5 (Ar), 96.9 (C1), 71.5 (C3), 70.5 (PhCH<sub>2</sub>O), 68.3, 68.2 (C4, C5), 62.1 (C6), 52.0 (C2), 23.4, 21.0, 20.9, 20.8 (C(O)CH<sub>3</sub>).  $[\alpha]_{\text{D}}^{21}$  113 (c 1.0,  $\text{CHCl}_3$ ), HRMS(ES<sup>+</sup>): calcd. for C<sub>21</sub>H<sub>27</sub>NO<sub>9</sub>Na: 460.1584; found: 460.1594.

**Treatment of benzyl 2-acetamido-3,4,6-tri-O-acetyl-2-deoxy- $\beta$ -D-glucopyranose (5) with either Sc(OTf)<sub>3</sub> or acetic acid:**

To benzyl glucoside (**5**) (100 mg, 0.23 mmol) in  $\text{CH}_2\text{Cl}_2$  (0.75 mL) was added either Sc(OTf)<sub>3</sub> (17 mg, 0.034 mmol) or  $\text{CH}_3\text{CO}_2\text{H}$  (13  $\mu\text{L}$ , 0.23 mmol) before the reaction mixture was heated to 110 °C under microwave irradiation for 5 h. The reaction mixture was then diluted with  $\text{CH}_2\text{Cl}_2$  (20 mL) and washed with  $\text{NaHCO}_3$  (aq. sat. 20 mL), dried ( $\text{MgSO}_4$ ), concentrated under reduced pressure (full recovery of material) and analysed by NMR spectroscopy to be starting material **5**.

**Treatment of benzyl 2-acetamido-3,4,6-tri-O-acetyl-2-deoxy- $\beta$ -D-glucopyranose (5) with Sc(OTf)<sub>3</sub> and acetic acid:**

To benzyl glucoside (**5**) (100 mg, 0.23 mmol) in  $\text{CH}_2\text{Cl}_2$  (0.75 mL) was added Sc(OTf)<sub>3</sub> (17 mg, 0.034 mmol) and  $\text{CH}_3\text{CO}_2\text{H}$  (13  $\mu\text{L}$ , 0.23 mmol) before the reaction mixture was heated to 110 °C under microwave irradiation for 5 h. The reaction mixture was then diluted with  $\text{CH}_2\text{Cl}_2$  (20 mL) and washed with  $\text{NaHCO}_3$  (aq. sat. 20 mL), dried ( $\text{MgSO}_4$ ), concentrated under reduced pressure (near full recovery of material) and analysed by NMR spectroscopy to be an anomeric mixture of benzyl glycosides (**5 $\alpha\beta$** ).

---

<sup>i</sup> F. Iglesias-Guerra, I. Romero, F. Alcudia, J. M. Vega-Pérez, *Carbohydr. Res.*, 1998, **308**, 57-62

<sup>ii</sup> D.A. Griffith, S.J. Danishefsky, *J. Am. Chem. Soc.*, 1990, **112**, 5811-5819

<sup>iii</sup> A. F. G. Bongat, M. N. Kamat, A.V. Demchenko, *J. Org. Chem.*, 2007, **72**, 1480-1483.

<sup>iv</sup> K. Nunokawa, S. Onaka, T. Yamaguchi, T. Ito, S. Watase, M. Nakamoto, *Bull. Chem. Soc. Jpn.*, 2003, **76**, 1601-1602.
